# Supplementary material for: Risk of punishment influences discrete and coordinated encoding of reward-guided actions by prefrontal cortex and VTA neurons
Source: eLife journal article supplement (doi:10.7554/elife.30056), 2017-10-23
Supplement: supp [file elife_poa_e30056_Figure_2_figure_supplement_1.pdf › elife_poa_e30056_Figure_2_figure_supplement_1.pdf]

## Figure 2-figure supplement 1

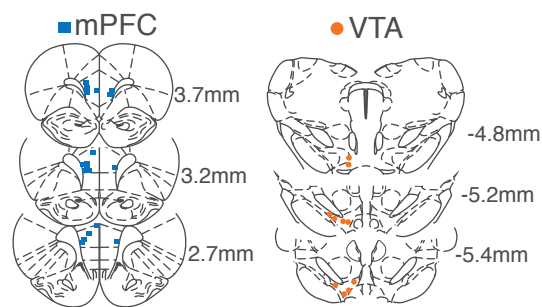

Figure 2-figure supplement 1. Histologically verified placements of mPFC and VTA electrodes. We recorded activity of ipsilateral VTA and mPFC (N=10) or bilateral mPFC (N=4). Coordinates are relative to the bregma.
