# Supplementary material for: Risk of punishment influences discrete and coordinated encoding of reward-guided actions by prefrontal cortex and VTA neurons
Source: eLife journal article supplement (doi:10.7554/elife.30056), 2017-10-23
Supplement: supp [file elife_poa_e30056_Figure_3_figure_supplement_1.pdf › elife_poa_e30056_Figure_3_figure_supplement_1.pdf]

## Figure 3-figure supplement 1

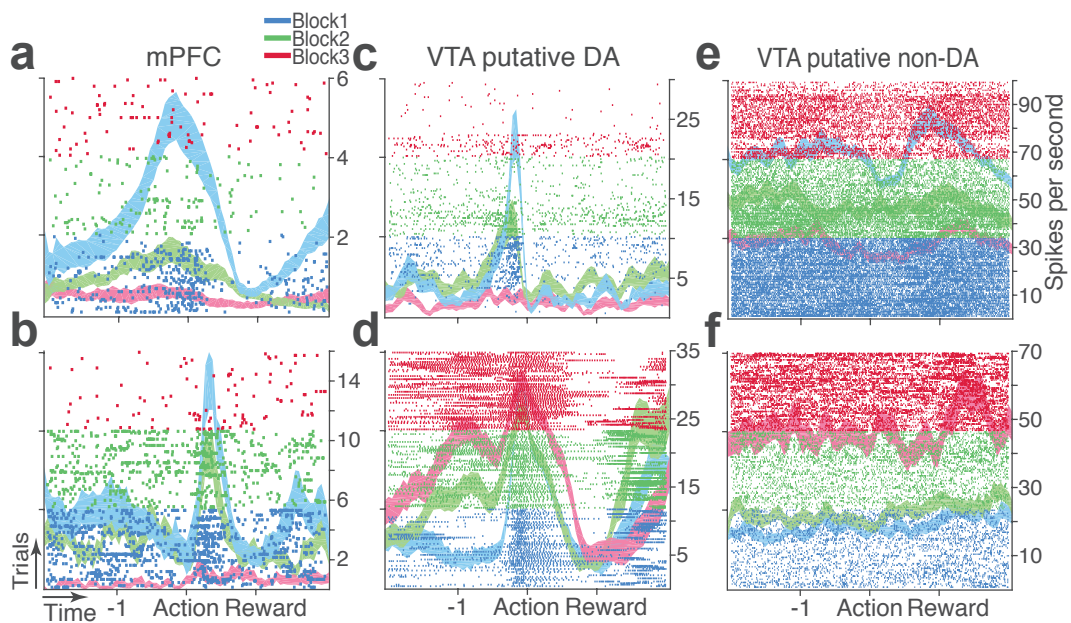

Figure 3-figure supplement 1. Representative punishment-encoding mPFC (a-b), VTA putative DA (c-d), and non-DA (e-f) single units. In each plot, data are for 150 trials of action with three different levels of punishment contingency. Each row represents each trial. Ticks mark spike times. The horizontal axis represents time around the action occurring at time = 0. Spike density functions of different blocks are superimposed as mean  $\pm$  s.e.m. (shaded area).
