# Supplementary material for: Risk of punishment influences discrete and coordinated encoding of reward-guided actions by prefrontal cortex and VTA neurons
Source: eLife journal article supplement (doi:10.7554/elife.30056), 2017-10-23
Supplement: supp [file elife_poa_e30056_Figure_6_figure_supplement_1.pdf › elife_poa_e30056_Figure_6_figure_supplement_1.pdf]

# Figure 6-figure supplement 1

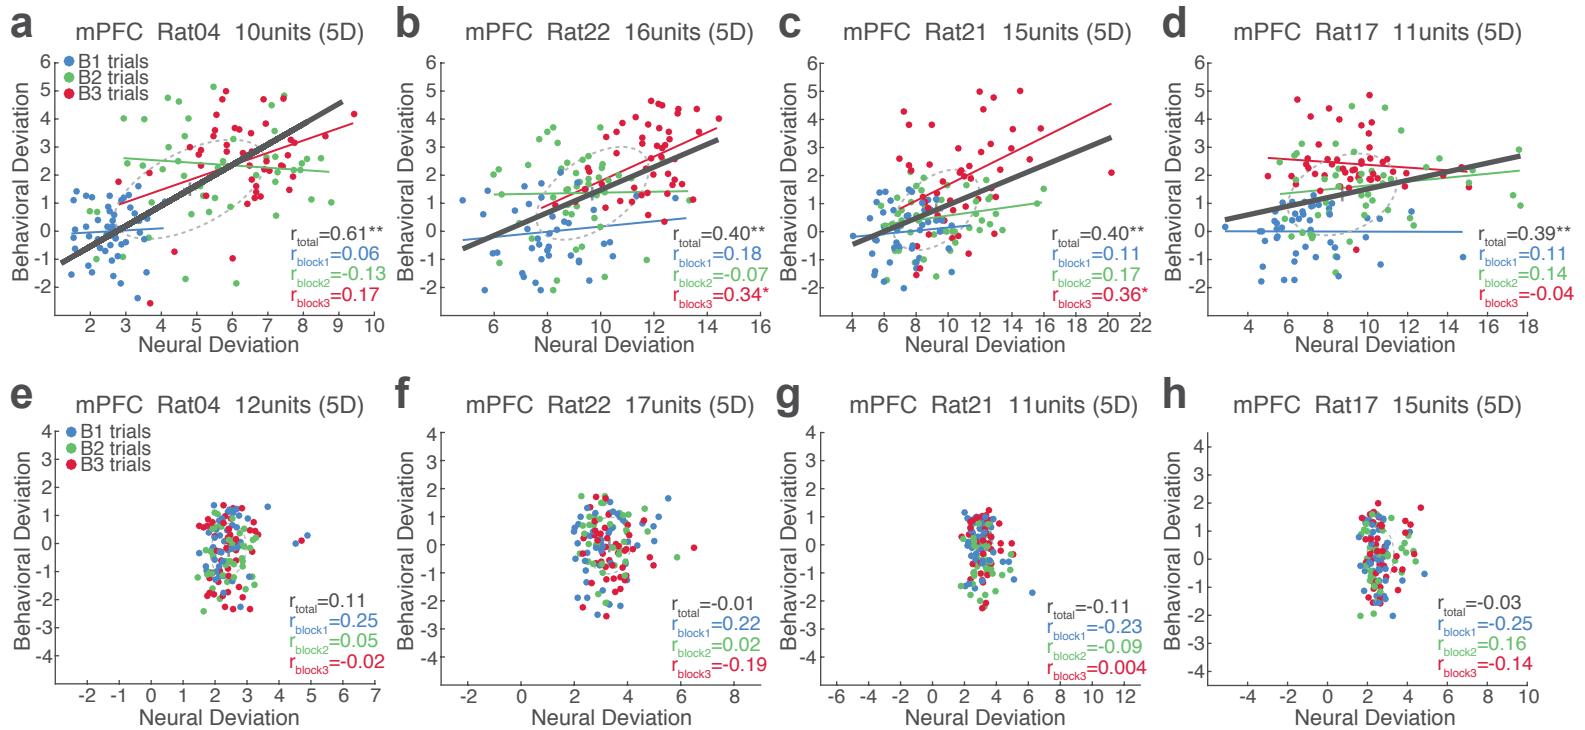

Figure 6-figure supplement 1. Single-trial analysis of mPFC neuronal population activity reveals the linkage between neural and behavioral variability during risky reward-seeking. (a-d) Scatter plots represent each animal's behavioral deviation from the block 1 mean RT vs neural deviation from the block 1 mean neural population trajectory. RT was log transformed for proper scaling. In each plot, the animal's ID, the number of units comprising the neuronal population, and the state space dimensionality are indicated. Superimposed color-coded lines indicate regression slopes per block. The dark gray line indicates the regression slope for total trials pooled across blocks. The behavioral and neural correlation coefficients calculated on total trials and trials per block are indicated. \* $p < 0.05$ , \*\* $p < 0.005$ . (e-h) Data from no-shock control sessions. Note the lack of behavioral and neural correlation in the absence of risk.
