# Supplementary material for: Risk of punishment influences discrete and coordinated encoding of reward-guided actions by prefrontal cortex and VTA neurons
Source: eLife journal article supplement (doi:10.7554/elife.30056), 2017-10-23
Supplement: supp [file elife_poa_e30056_Figure_6_figure_supplement_2.pdf › elife_poa_e30056_Figure_6_figure_supplement_2.pdf]

## Figure 6-figure supplement 2

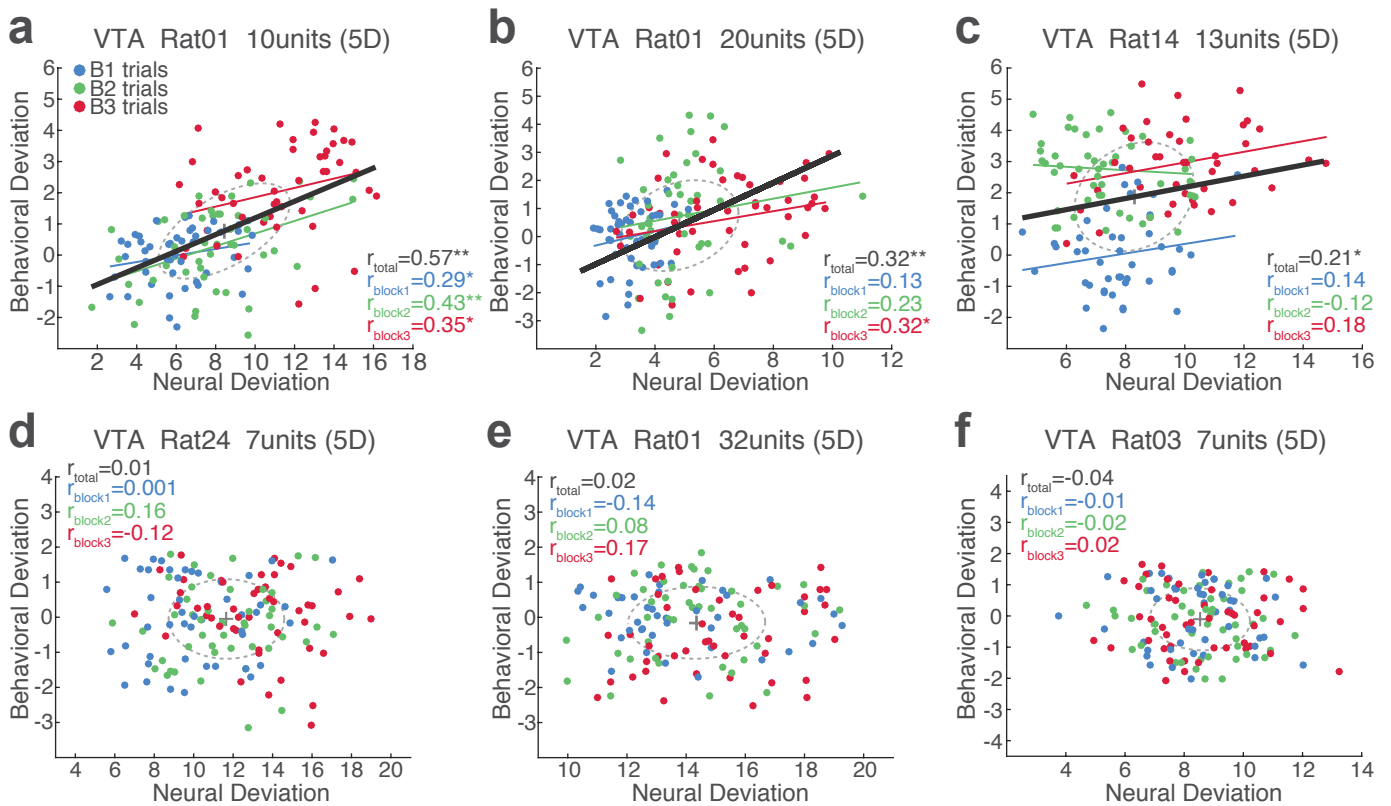

Figure 6-figure supplement 2. Single-trial analysis of VTA neuronal population activity reveals the linkage between neural and behavioral variability during risky reward-seeking. (a-c) Scatter plots represent each animal's behavioral deviation from the block 1 mean RT vs neural deviation from the block 1 mean neural population trajectory. (d-f) Data from no-shock control sessions, indicating the lack of behavioral and neural correlation in the absence of punishment risk.
