# Supplementary material for: Risk of punishment influences discrete and coordinated encoding of reward-guided actions by prefrontal cortex and VTA neurons
Source: eLife journal article supplement (doi:10.7554/elife.30056), 2017-10-23
Supplement: supp [file elife_poa_e30056_Figure_7_figure_supplement_1.pdf › elife_poa_e30056_Figure_7_figure_supplement_1.pdf]

## Figure 7-figure supplement 1

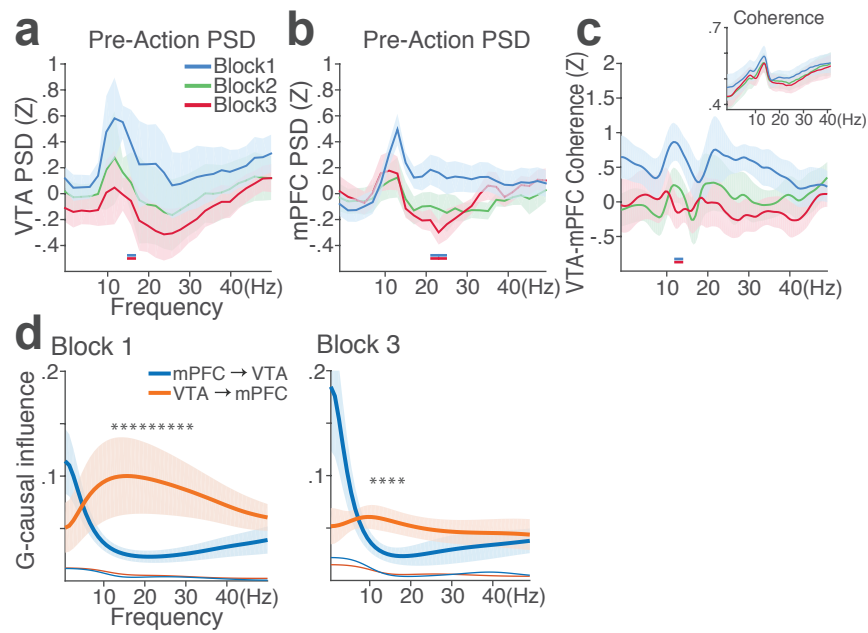

Figure 7-figure supplement 1. mPFC and VTA theta oscillations did not change across blocks in the absence of punishment. (a) Mean  $\pm$  s.e.m. (shaded area) normalized VTA PSDs of each block corresponding to the 1-s pre-action epoch. Dual-colored bars below indicate significant pairwise differences at corresponding frequency bins according to post hoc analyses ( $p < 0.05$ ). (b) Normalized mPFC PSDs. (c) Normalized VTA-mPFC LFP coherence of each block in the pre-action epoch. Insets represent non-normalized LFP coherences. (d) Granger-causality, representing mutual influences (directionality) between VTA and mPFC peri-action LFP time series in block 1 (left) & 3 (right). Blue and orange curves represent mPFC-to-VTA and VTA-to-mPFC Granger-causal influences, respectively. Shaded areas indicate s.e.m. Thin colored-lines below indicate upper bounds of confidence intervals ( $\alpha = 0.001$ ) acquired by the random permutation resampling of time bins. An asterisk indicates significant difference between bidirectional Granger-causal influences at the corresponding frequency bin ( $p < 0.05$ ).
