# Supplementary material for: Risk of punishment influences discrete and coordinated encoding of reward-guided actions by prefrontal cortex and VTA neurons
Source: eLife journal article supplement (doi:10.7554/elife.30056), 2017-10-23
Supplement: supp [file elife_poa_e30056_Figure_9_figure_supplement_1.pdf › elife_poa_e30056_Figure_9_figure_supplement_1.pdf]

# Figure 9-figure supplement 1

Phase-locking of VTA spikes to mPFC theta oscillation

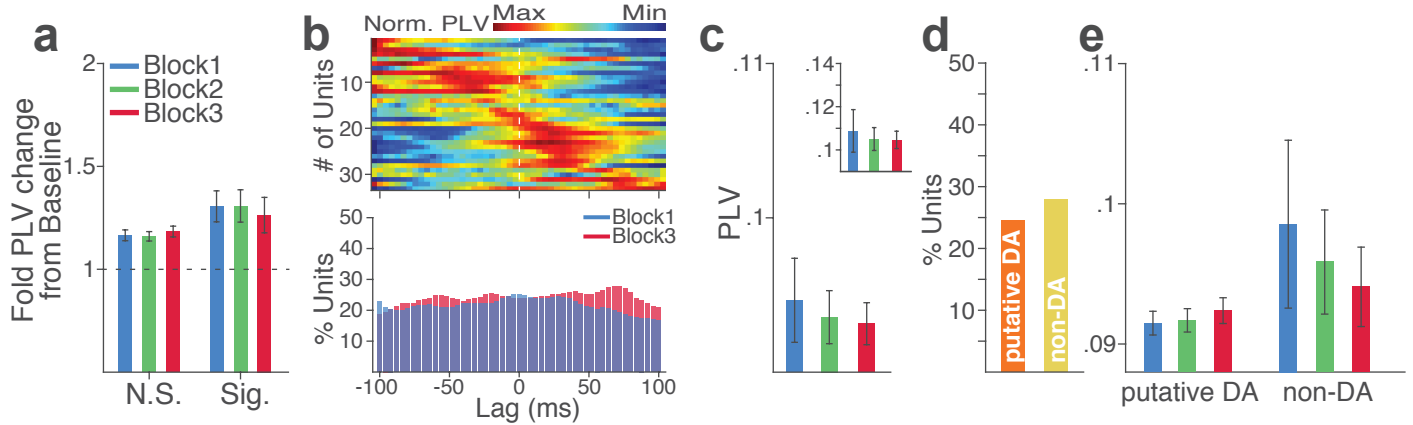

Figure 9-figure supplement 1. VTA single units show weak phase synchrony to the mPFC theta oscillation. (a) Fold change from baseline in the strength of the neuronal phase-locking. (b) Top, Normalized PLVs in block 1 for all phase-locked VTA units. The phase-locked units displayed their peak PLVs with negative or positive time lags, indicating weak phase modulation of VTA spike activity by the mPFC theta oscillation (Signed-rank test,  $p = 0.129$ ). Bottom, Percentage of significantly phase-locked VTA units did not differ across blocks. (c) Mean  $\pm$  s.e.m. PLVs across different blocks. No significant change was found across blocks (Signed-rank test,  $p$  values  $> 0.33$ ). (d) Percentage of phase-locked VTA putative DA and non-DA units. (e) PLVs of VTA putative DA and non-DA units plotted separately. PLVs did not differ across blocks in both VTA cell types (Signed-rank test,  $p$  values  $> 0.25$ ).
