# Supplementary material for: Risk of punishment influences discrete and coordinated encoding of reward-guided actions by prefrontal cortex and VTA neurons
Source: eLife journal article supplement (doi:10.7554/elife.30056), 2017-10-23
Supplement: supp [file elife_poa_e30056_Figure_9_figure_supplement_2.pdf › elife_poa_e30056_Figure_9_figure_supplement_2.pdf]

## Figure 9-figure supplement 2

Phase-locking of mPFC spikes to mPFC theta oscillation

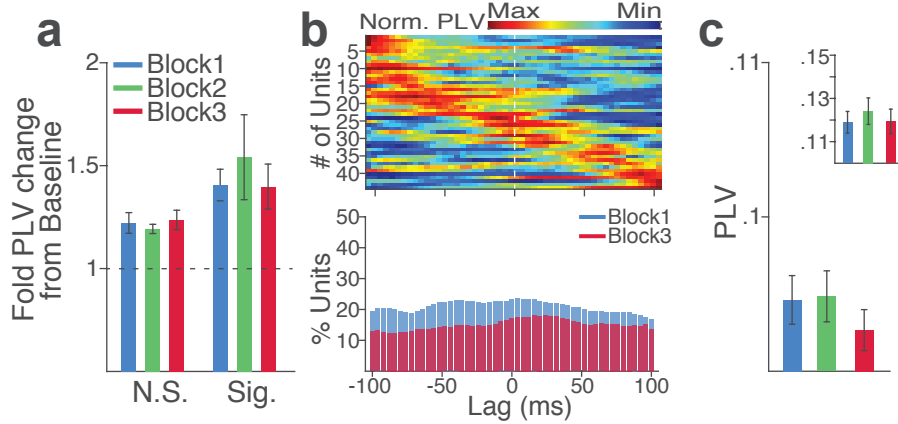

Phase-locking of mPFC spikes to VTA theta oscillation

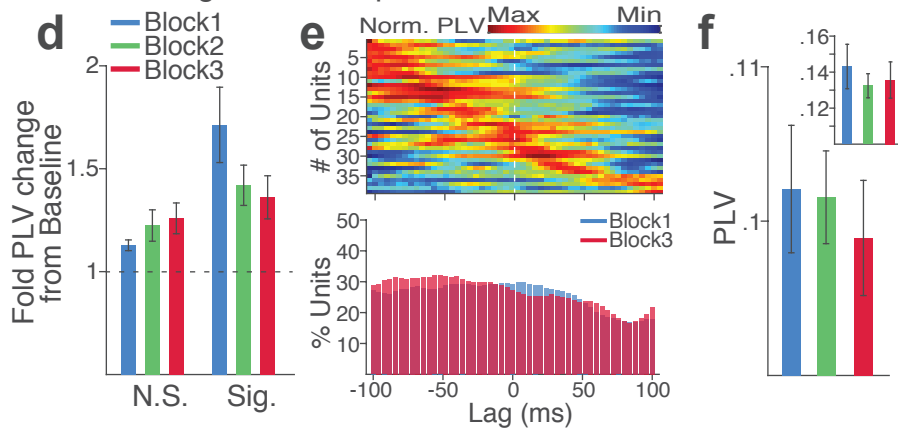

Figure 9-figure supplement 2. mPFC neuronal synchrony to mPFC and VTA theta oscillations did not change across blocks in the absence of punishment (No-shock control). (a-c) mPFC neuronal phase-locking to mPFC theta oscillation. (a) Fold change from baseline in the strength of the neuronal phase-locking during peri-action epoch in units that passed Rayleigh z-test (Sig.) and rest of the units (N.S.). (b) Top, Normalized PLVs in block 1 across a range of time lags for all phase-locked mPFC units, aligned by peak lags. Bottom, Percentage of significantly phase-locked mPFC units in block 1 vs 3 across a range of lags. (c) Mean  $\pm$  s.e.m. PLVs across different blocks. Inset, PLVs including significantly phase-locked units only. The PLVs did not significantly differ across blocks (Signed-rank test,  $p$  values  $> 0.105$ ). (d-f) mPFC neuronal phase-locking to the VTA theta oscillation. The PLVs did not significantly differ across blocks (Signed-rank test,  $p$  values  $> 0.392$ ).
