# Supplementary material for: Risk of punishment influences discrete and coordinated encoding of reward-guided actions by prefrontal cortex and VTA neurons
Source: eLife journal article supplement (doi:10.7554/elife.30056), 2017-10-23
Supplement: supp [file elife_poa_e30056_Figure_9_figure_supplement_3.pdf › elife_poa_e30056_Figure_9_figure_supplement_3.pdf]

# Figure 9-figure supplement 3

## Phase-locking of VTA spikes to VTA theta oscillation

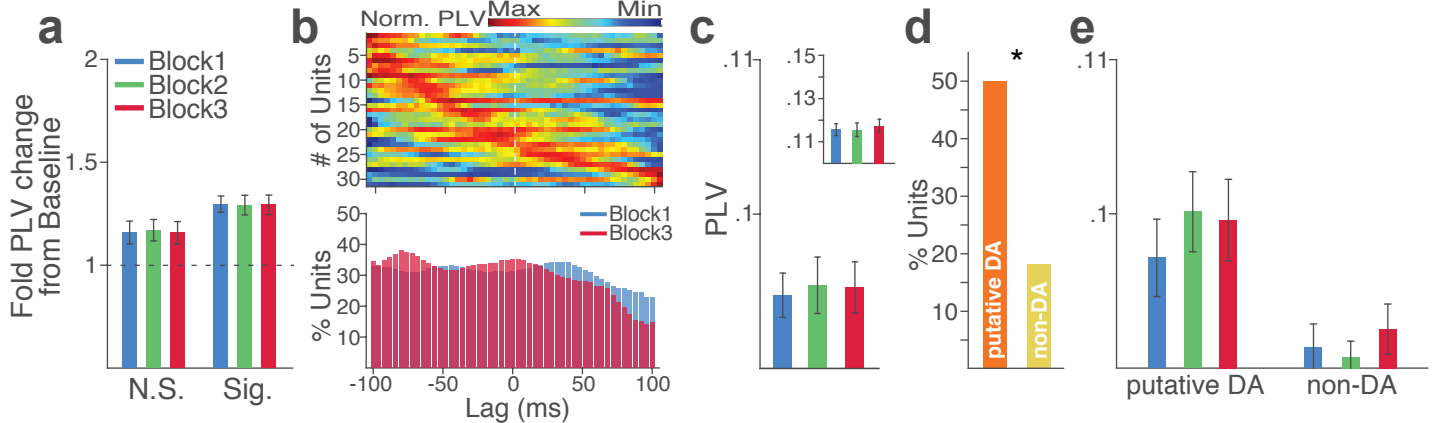

## Phase-locking of VTA spikes to mPFC theta oscillation

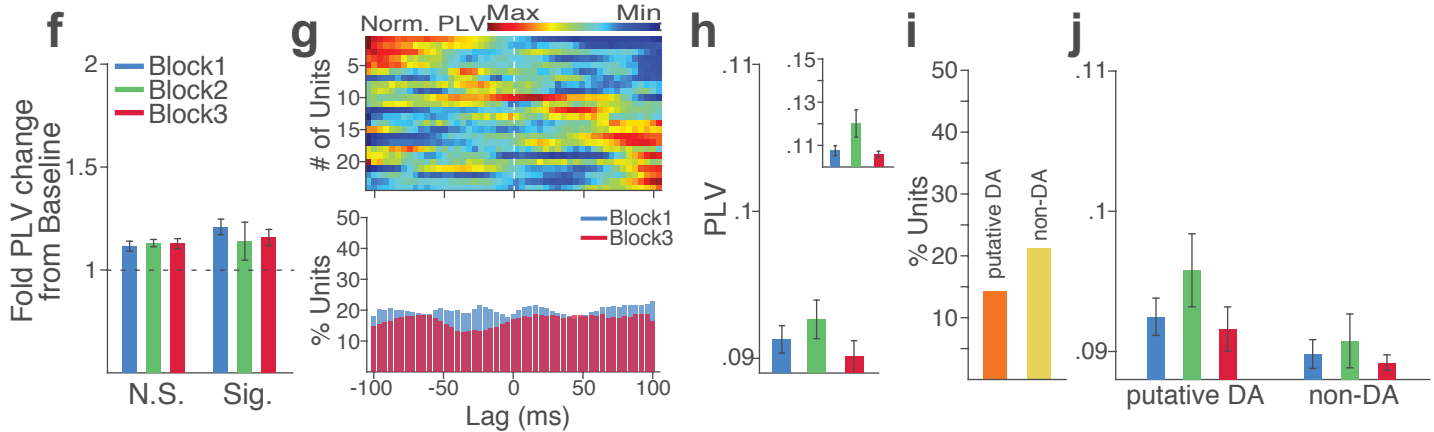

Figure 9-figure supplement 3. VTA neuronal synchrony to VTA and mPFC theta oscillations did not change across blocks in the absence of punishment (No-shock control). (a-e) VTA neuronal phase-locking to the VTA theta oscillation. (a) Fold change from baseline in the strength of the neuronal phase-locking during peri-action epoch in units that passed Rayleigh z-test (Sig.) and rest of the units (N.S.). (b) Top, Normalized PLVs in block 1 across a range of time lags for all phase-locked VTA units, aligned by s. Bottom, Percentage of significantly phase-locked VTA units in block 1 vs 3 across a range of lags. (c) Mean  $\pm$  s.e.m. PLVs across different blocks. The PLVs did not significantly differ across blocks (Signed-rank test, p values  $> 0.743$ ). Inset, PLVs including significantly phase-locked units only. (d) Percentage of phase-locked VTA putative DA and non-DA units. Greater fraction of putative DA units (50%) appeared to be phase-locked to the VTA theta oscillation compared with non-DA units (18%) (Chi-square test,  $\chi^2_1 = 6.959$ ,  $p = 0.008$ ). (e) PLVs of VTA putative DA and non-DA units plotted separately. (f-j) VTA neuronal phase-locking to the mPFC theta oscillation. The VTA neuronal phase-locking to the mPFC theta oscillation did not differ across blocks (Signed-rank test, p values  $> 0.355$ ).
